# Supplementary material
Source: PubMed Central journal article supplement (PMC4423077)
Supplement: cr201536x1.pdf [file cr201536x1.pdf]

## Supplementary Figures

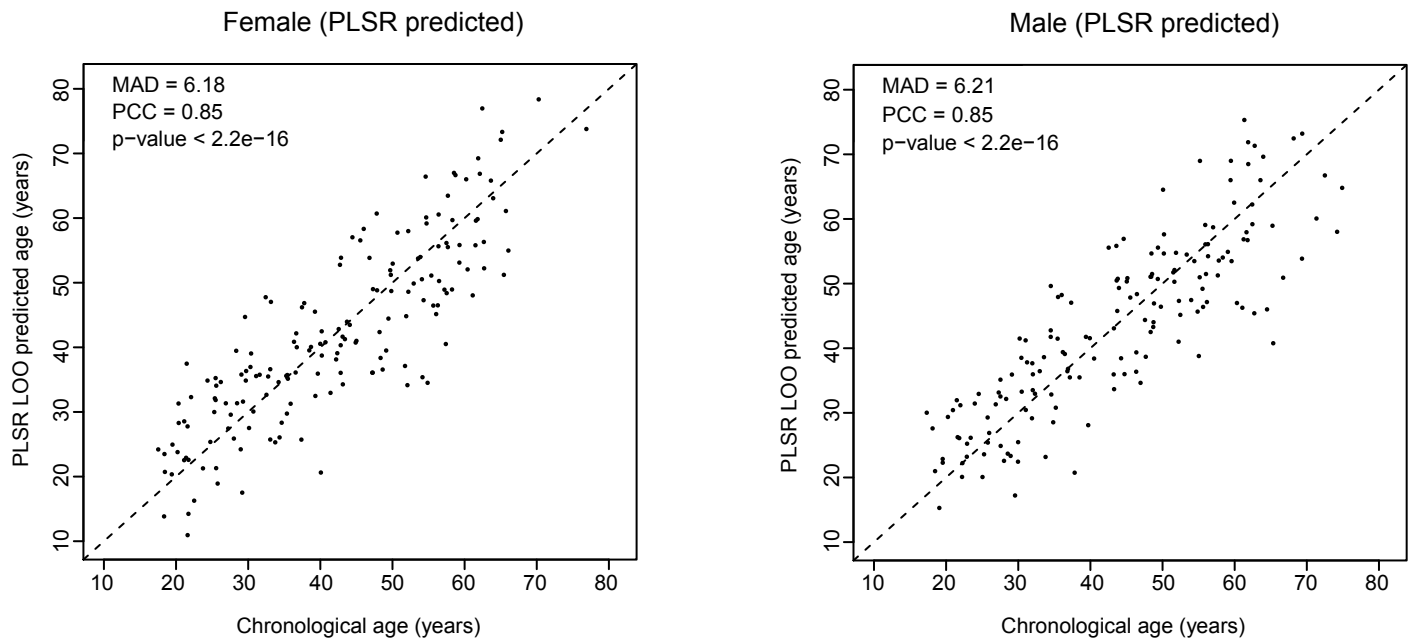

**Fig. S1.** Correlation of age predicted by facial vertices-based PLSR predictors with the actual age of the subjects. Predictors are trained separately in females and males using all but one sample to predict the age of the left out sample. The predictors are generated based on ages accurate to the day.
