# Supplementary material
Source: PubMed Central journal article supplement (PMC4423077)
Supplement: cr201536x2.pdf [file cr201536x2.pdf]

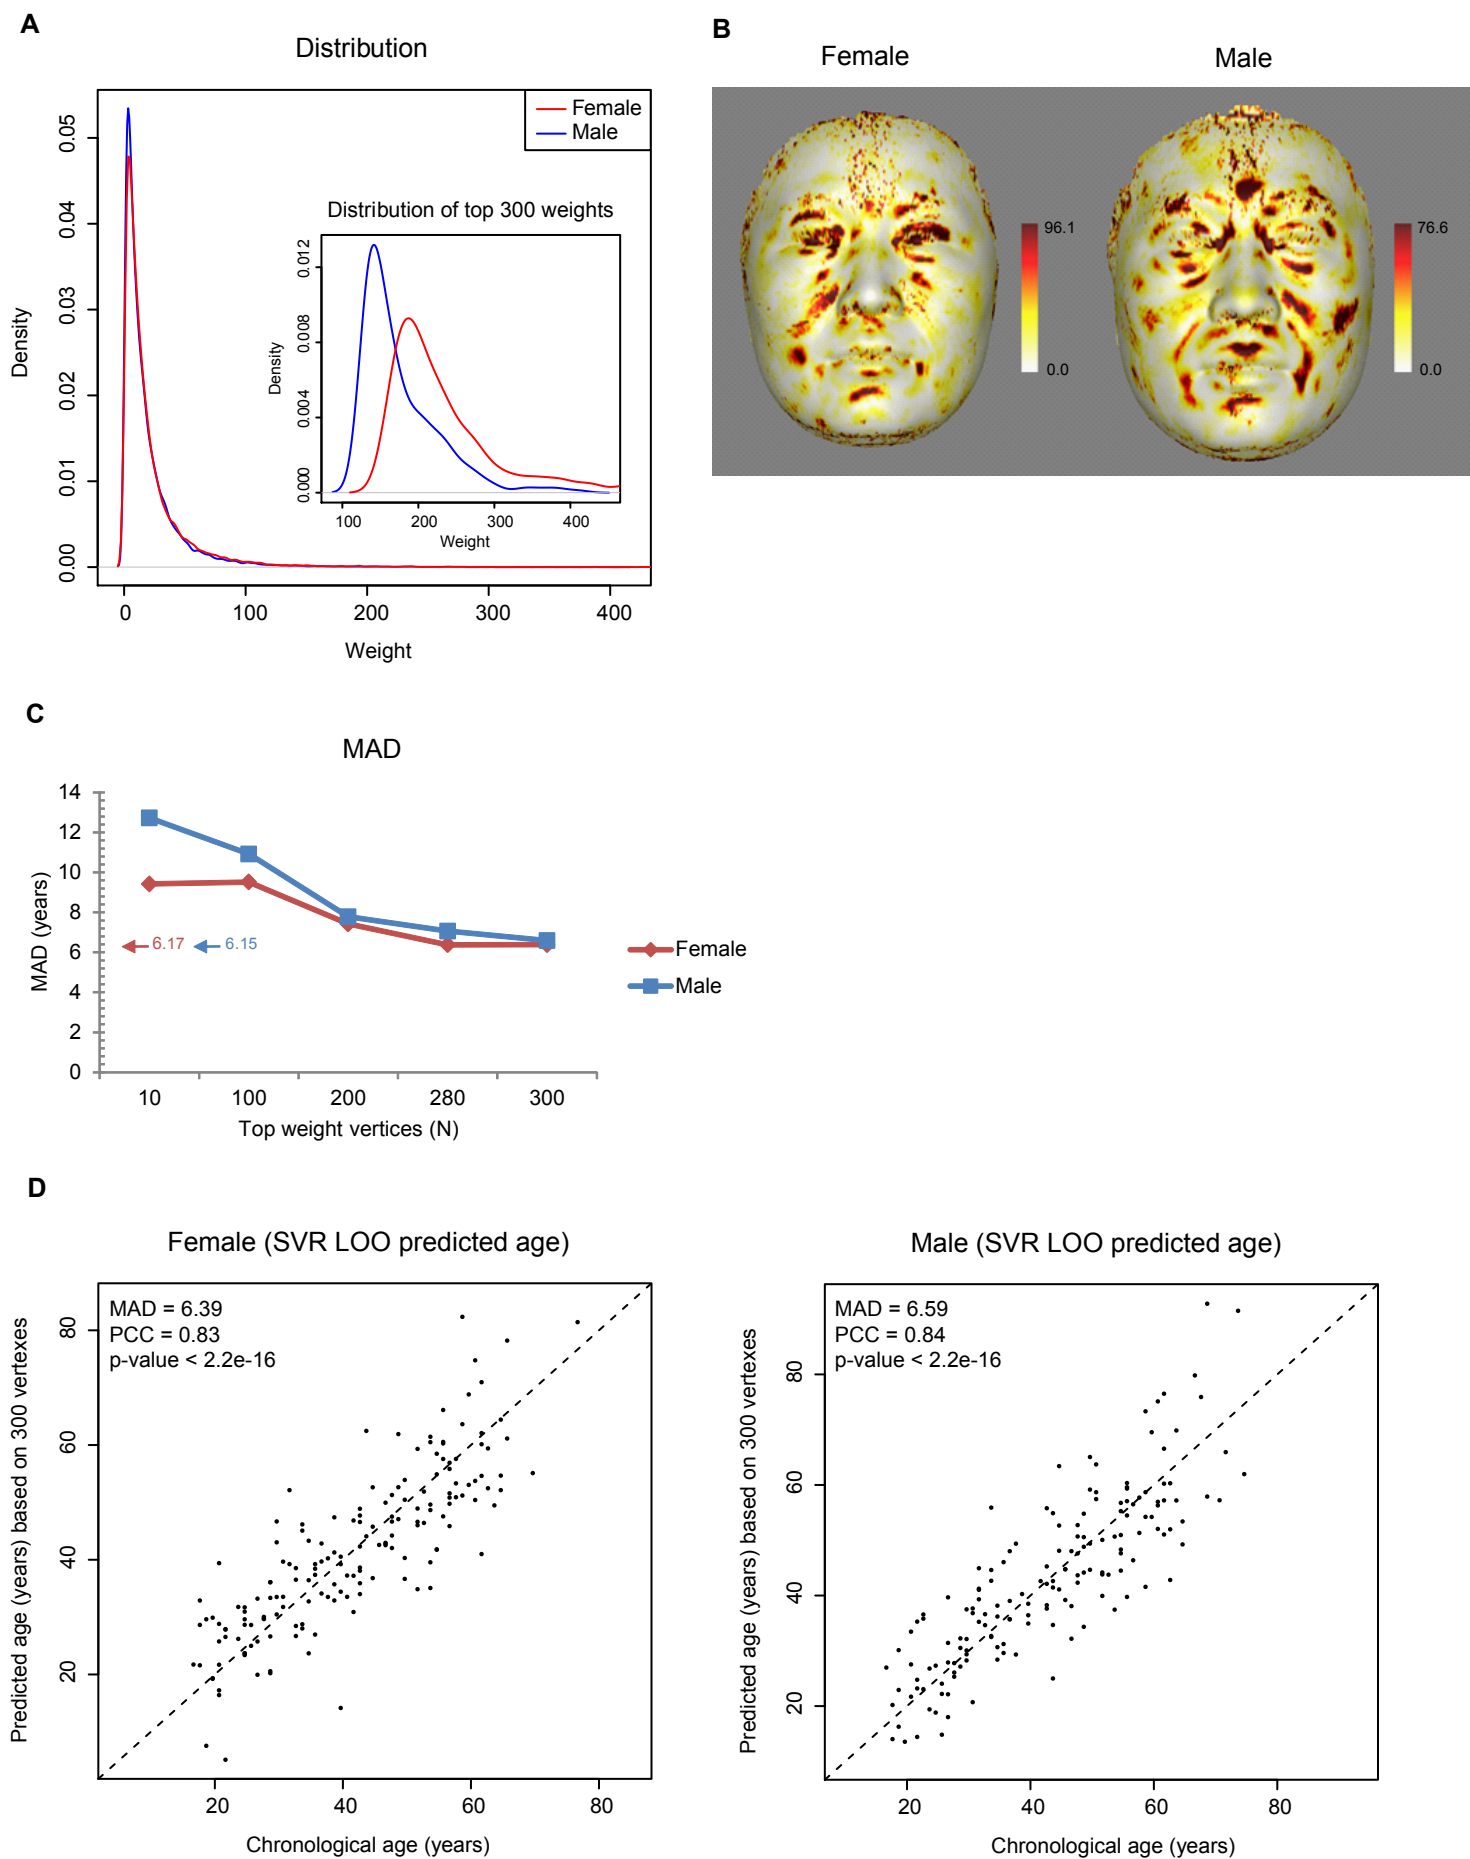

**Fig. S2.** Age predicted by 3D facial image vertices-based SVR predictors.

(A) The distribution of all vertices' weights in the SVR model, which was trained on all female and male subjects, respectively. (B) Heat map of weight values. Each vertex's weight is represented by the maximum value of its 3 coordinates' weights, and each coordinate's weight is calculated as  $(\text{original weight coefficient} \times 10,000)^2$ . (C) The mean absolute deviation (MAD) of LOO predicted using top N number of vertices with highest weights as indicated by the x-axis. The arrow indicates the performance of the SVR model after regularization. (D) Correlation of age predicted by the SVR predictor using the top 300 vertices of the highest weights, to the actual age of the subjects.
