# Supplementary material
Source: PubMed Central journal article supplement (PMC4423077)
Supplement: cr201536x3.pdf [file cr201536x3.pdf]

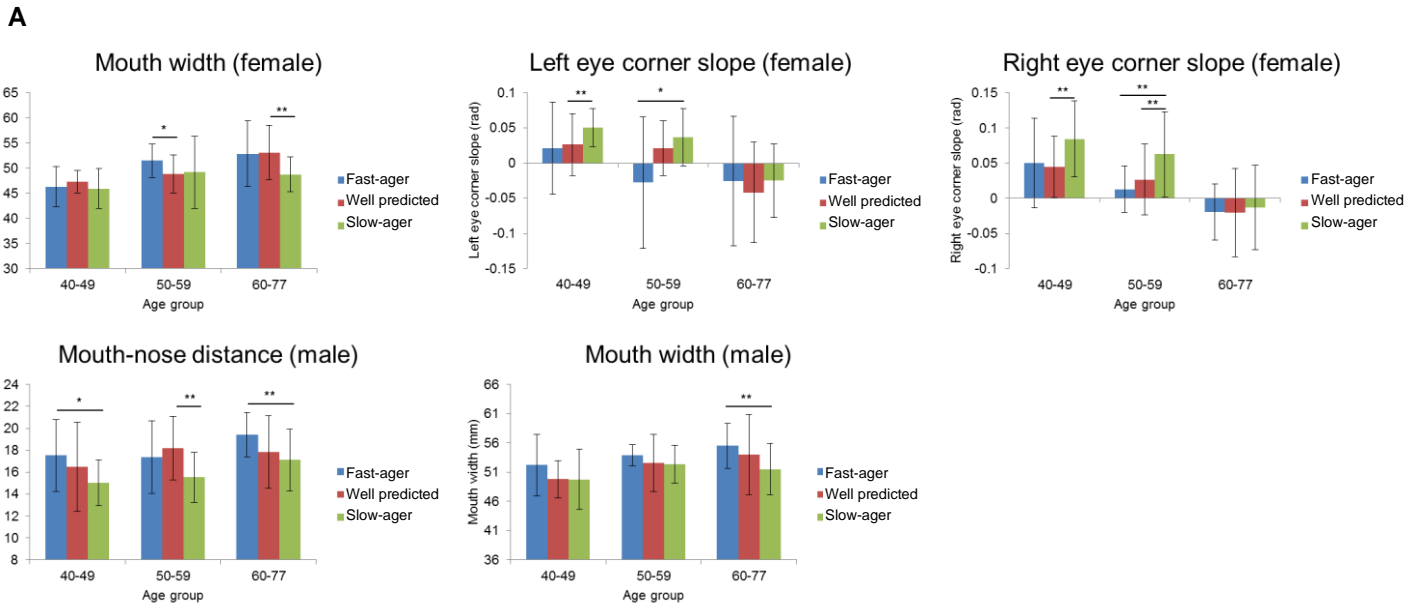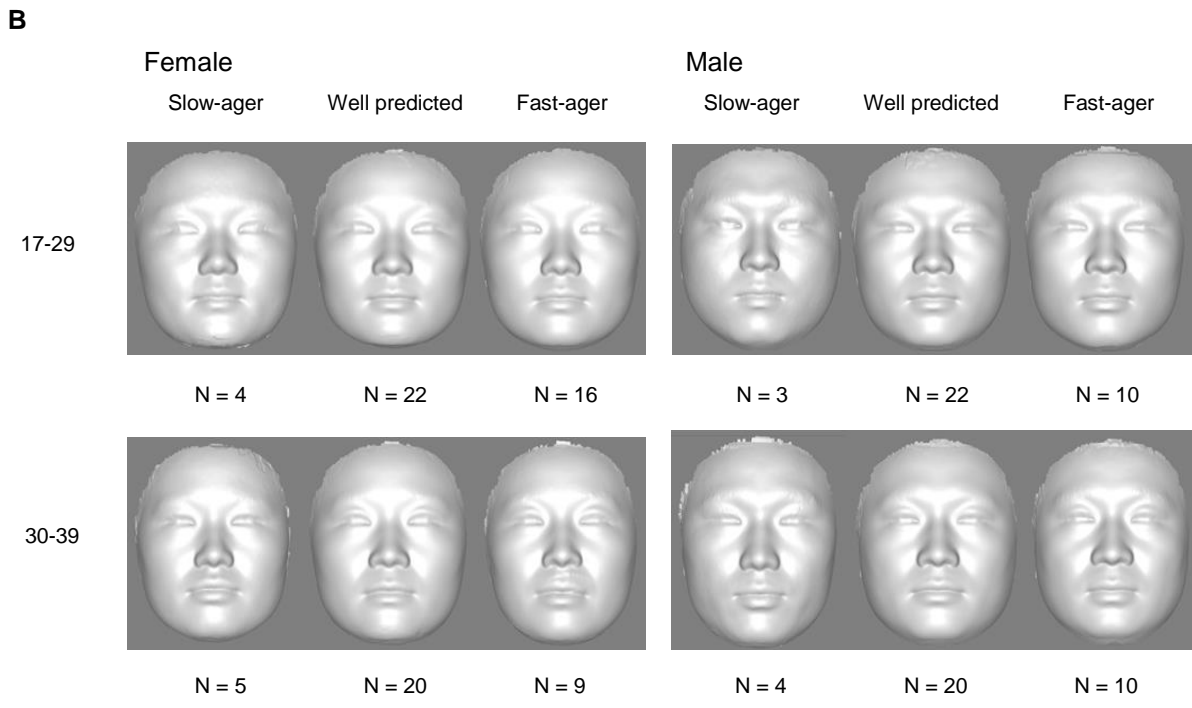

**Fig. S3.** Differences between predicted and actual ages in each age group and the mean 3D facial images in well predicted, slow- and fast-ager classes of younger age groups. (A) Levels of the quantified facial features in predicted fast-ager, slow-ager and well predicted subjects. \* and \*\* denote unpaired one-sided Student's *t*-test p-value < 0.1 and 0.05, respectively. Error bars denote +/- standard deviation. (B) The average profiles of the predicted slow-ager, well-predicted and fast-ager female and male subjects in age groups younger than 40 years old. The classification is based on the age difference > 6 years between predicted age and chronological age. N indicates the number of subjects in each class of each age group.
