# Supplementary material
Source: PubMed Central journal article supplement (PMC4423077)
Supplement: cr201536x6.pdf [file cr201536x6.pdf]

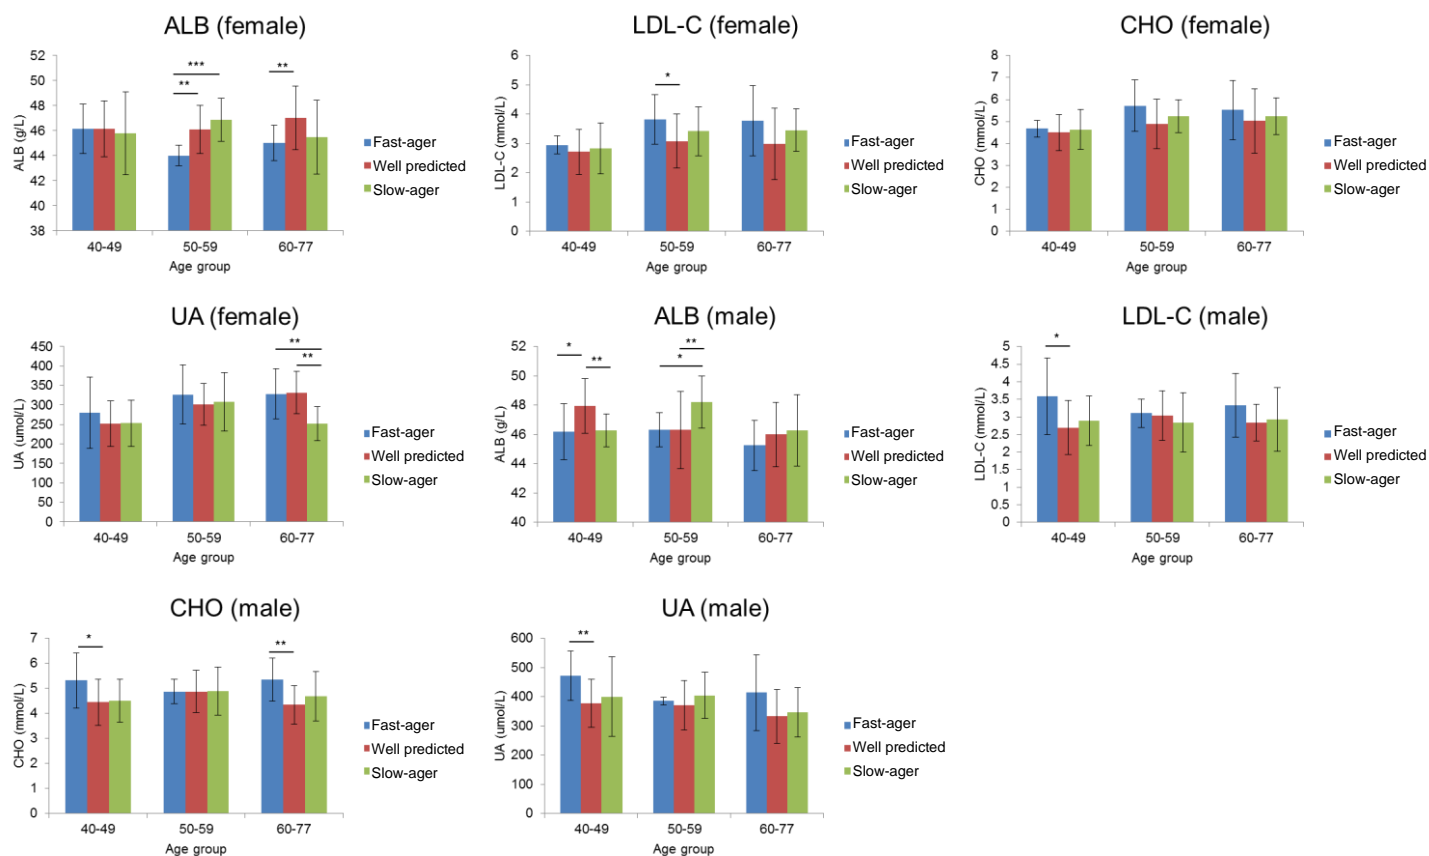

**Fig. S6.** Levels of the blood health indicators (showed in Fig. 3E) in predicted fast-agers, slow-agers and well-predicted subjects when the classification is based on the age difference > 7 years between predicted age and chronological age. \*, \*\* and \*\*\* denote unpaired one-sided Student's *t*-test p-value < 0.1, 0.05 and 0.001, respectively. Error bars denote +/- standard deviation.
