# Supplementary material
Source: PubMed Central journal article supplement (PMC4423077)
Supplement: cr201536x8.pdf [file cr201536x8.pdf]

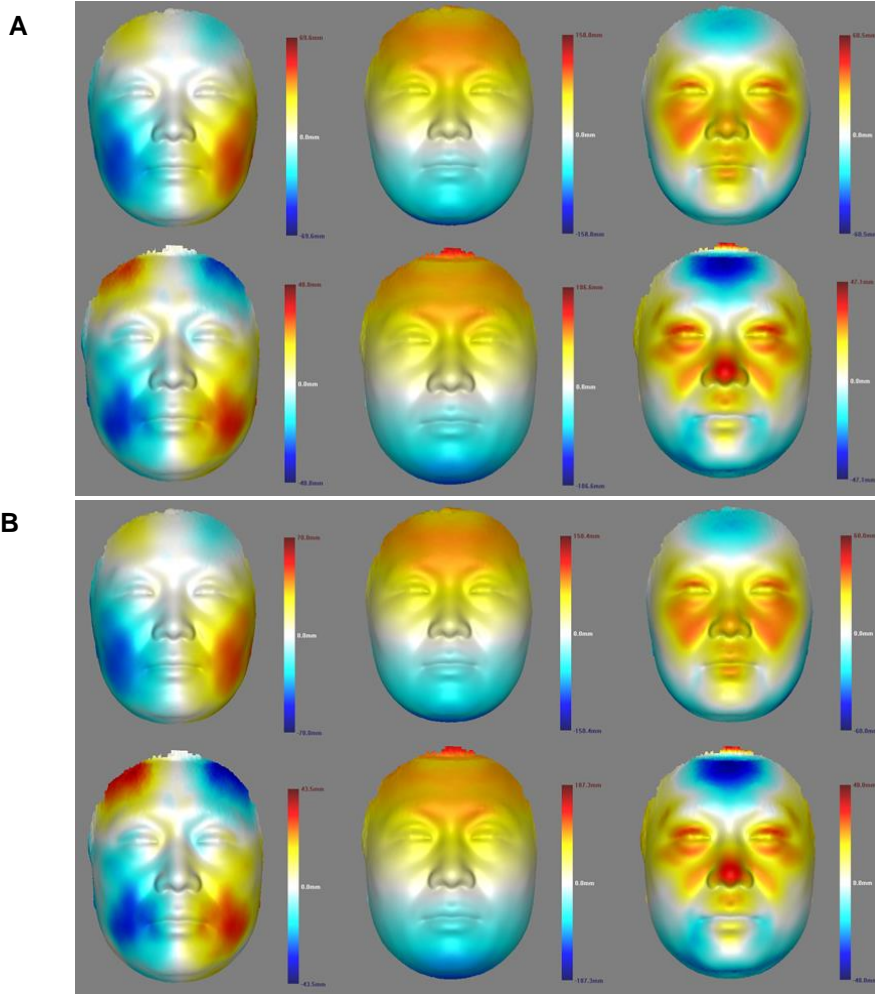

**Fig. S8.** The loading values of PLS component 1 of the new PLS model adjusted for BMI (A) or for cholesterol, LDLC and albumin (B) in three dimensions. In each panel, the top and bottom rows are for females and males, respectively. The three columns are loading values (multiplied by 10,000) of PLS component 1 projected on X coordinate, Y coordinate and Z coordinate, respectively. Red and blue denote, respectively, higher and lower values along x-, y- and z-axes.
