# Supplementary material
Source: PubMed Central journal article supplement (PMC4423077)
Supplement: cr201536x9.pdf [file cr201536x9.pdf]

Female

Male

X coordinate

Y coordinate

Z coordinate

X coordinate

Y coordinate

Z coordinate

WBC

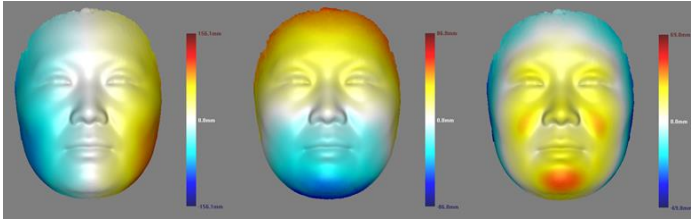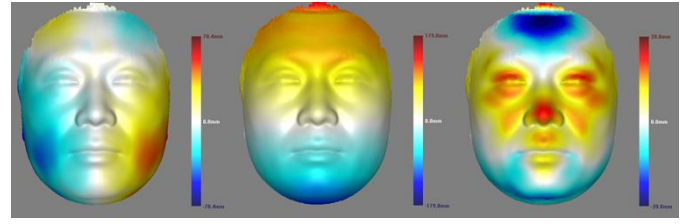

RBC

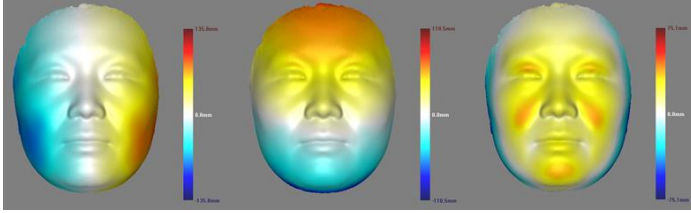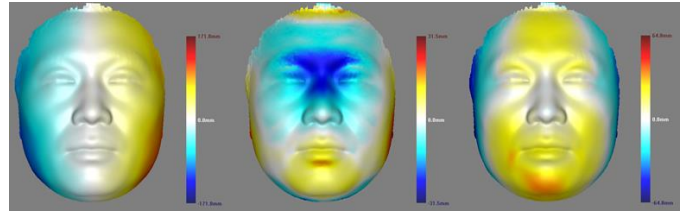

HGB

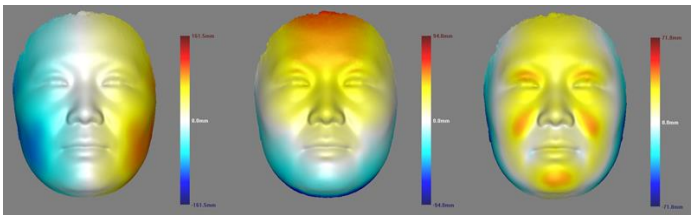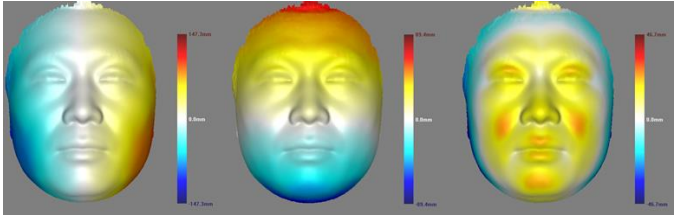

HCT

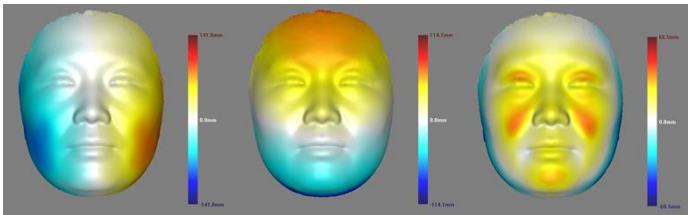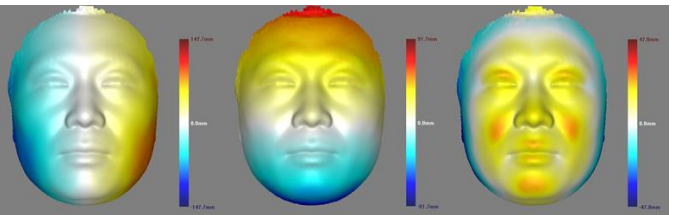

MCV

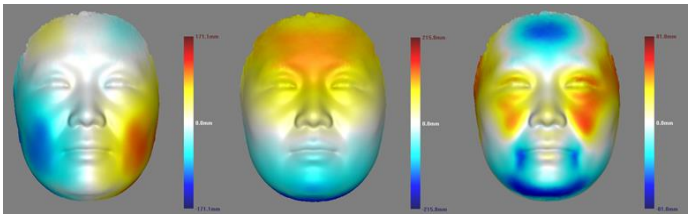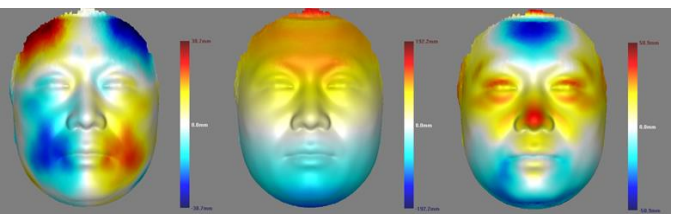

MCH

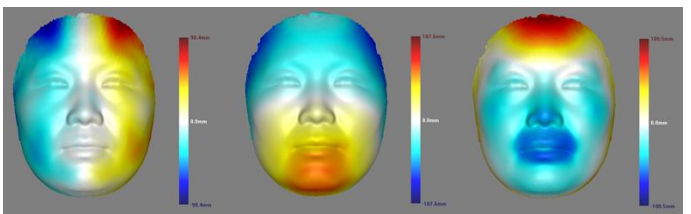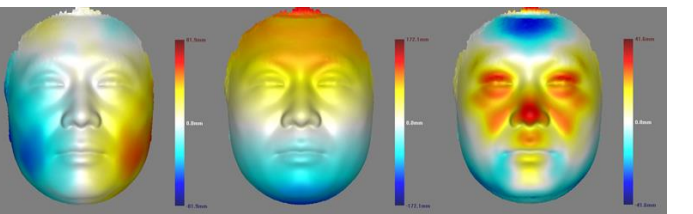

MCHC

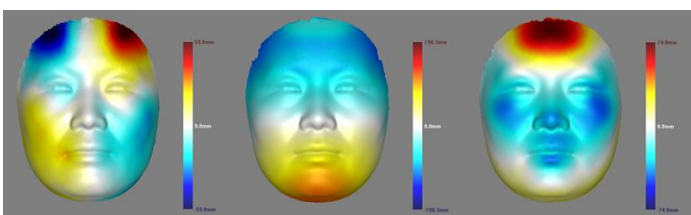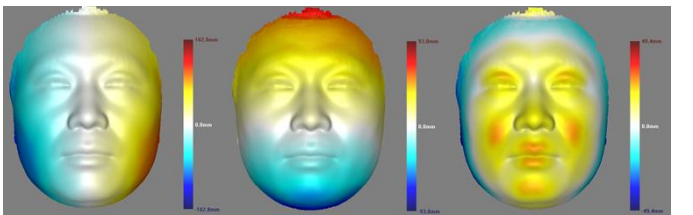

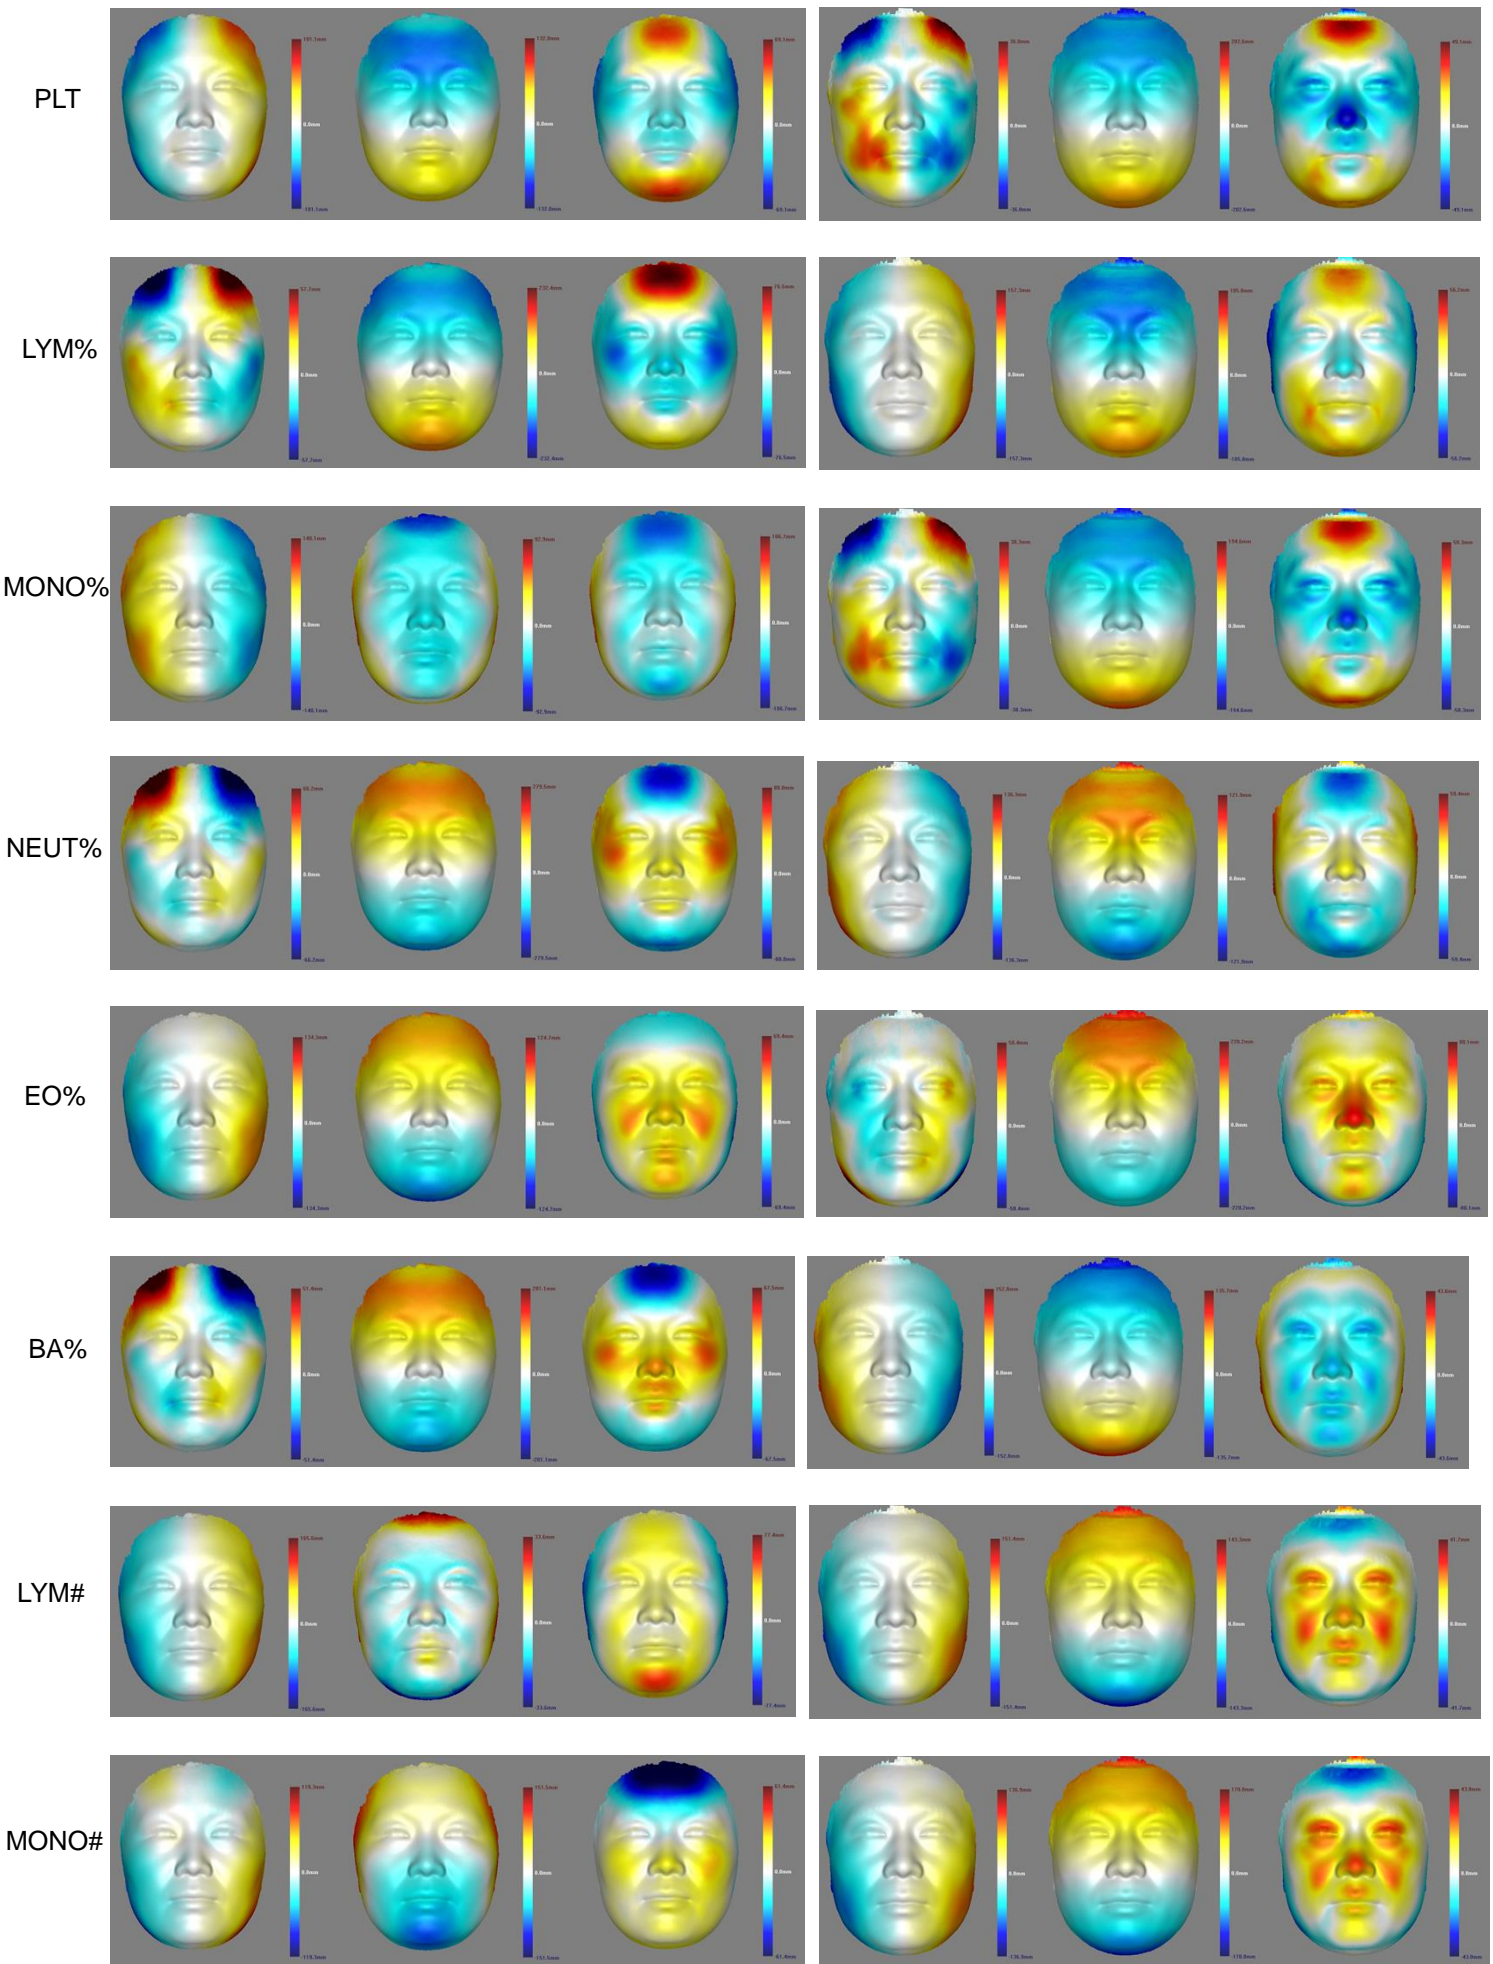

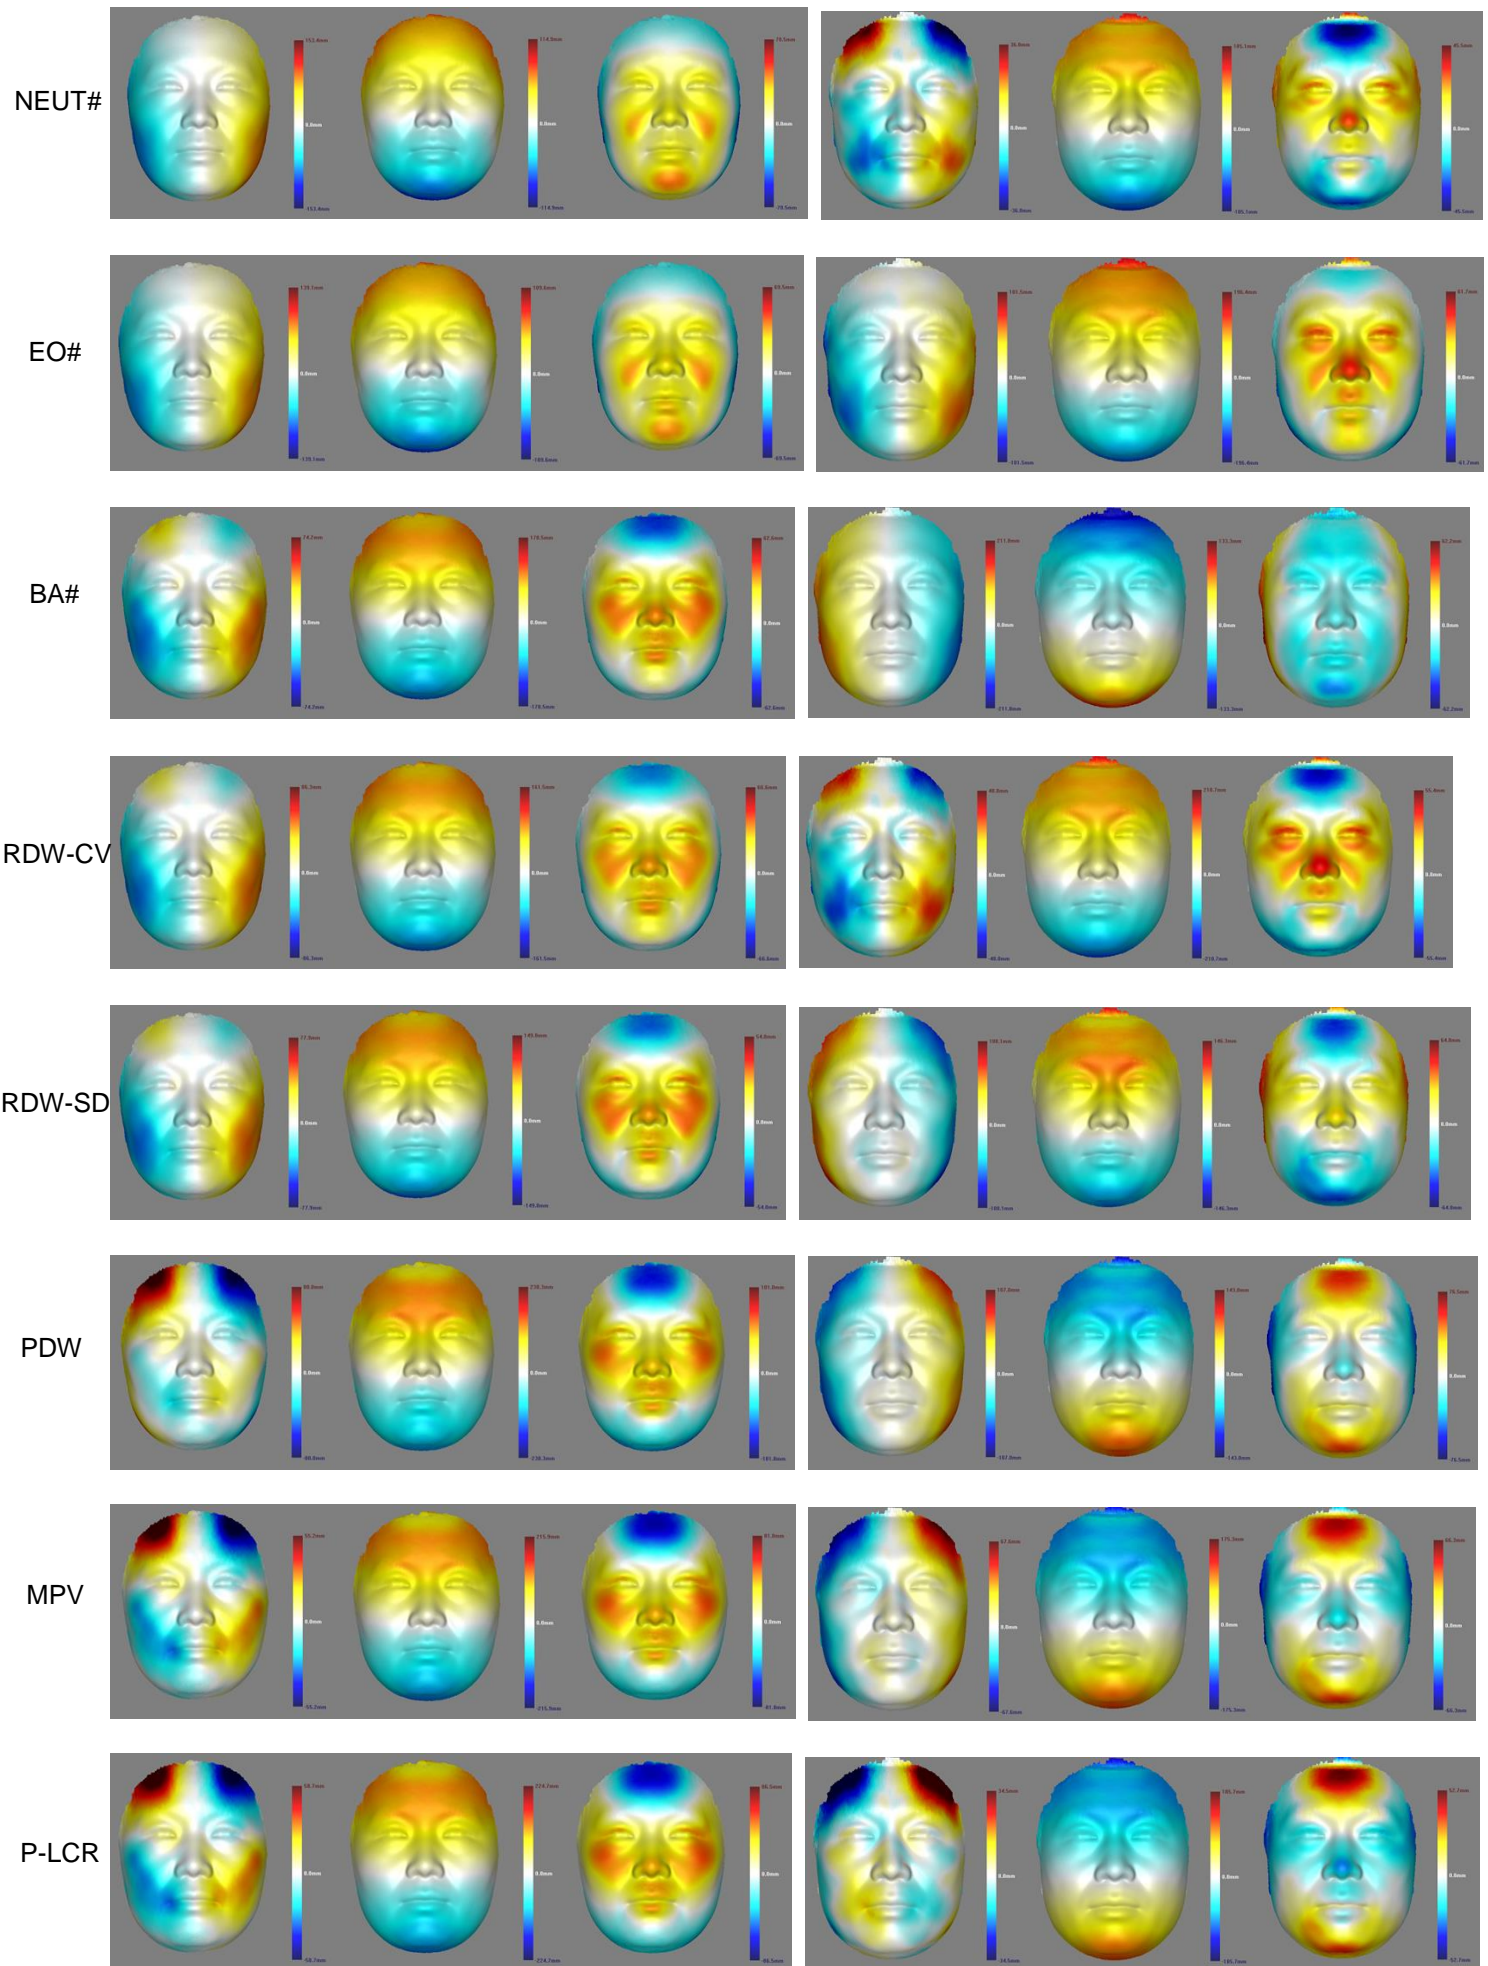

PCT

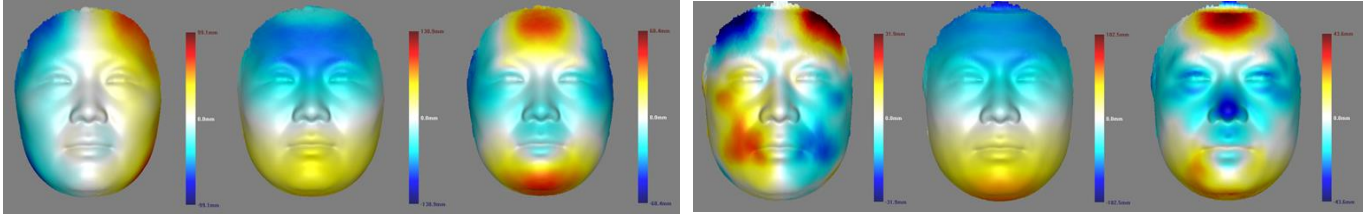

ALT

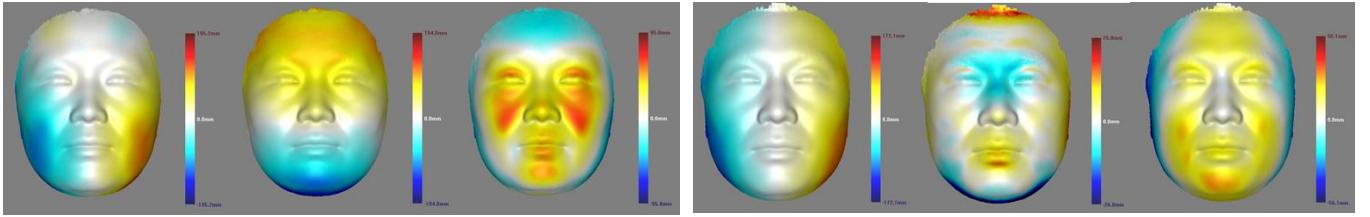

AST

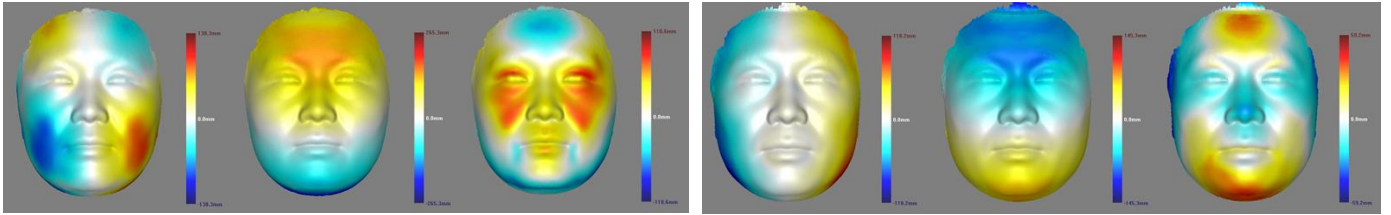

TBIL

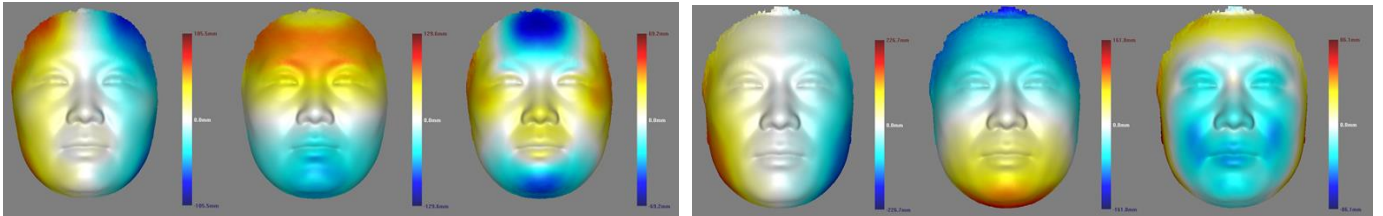

DBIL

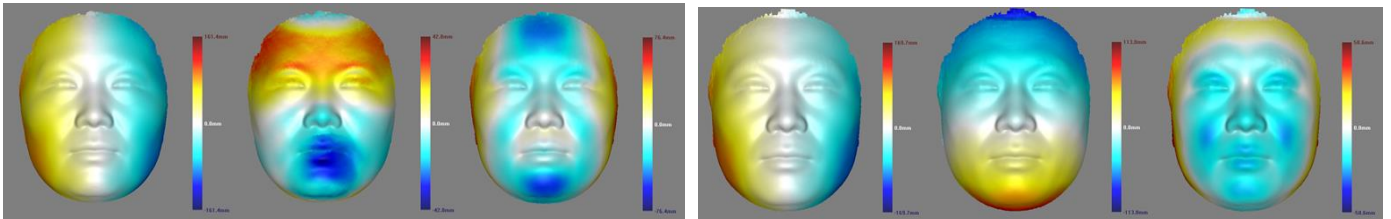

IBIL

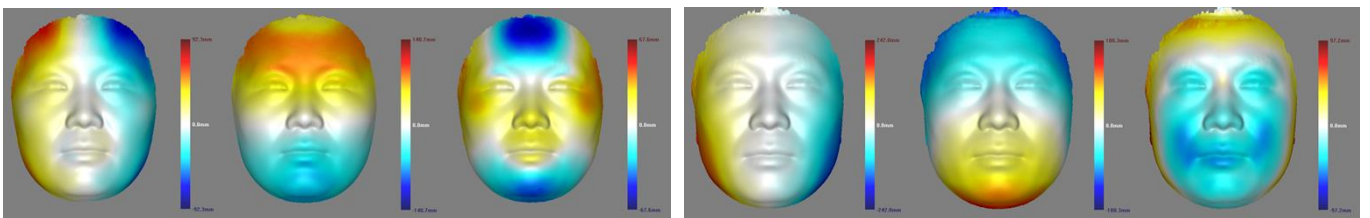

GGT

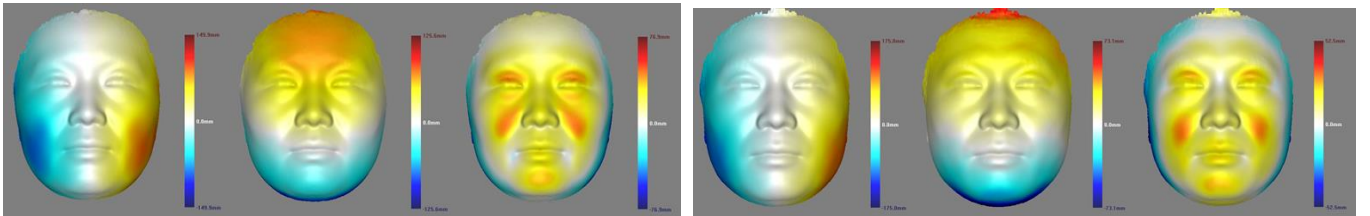

ALP

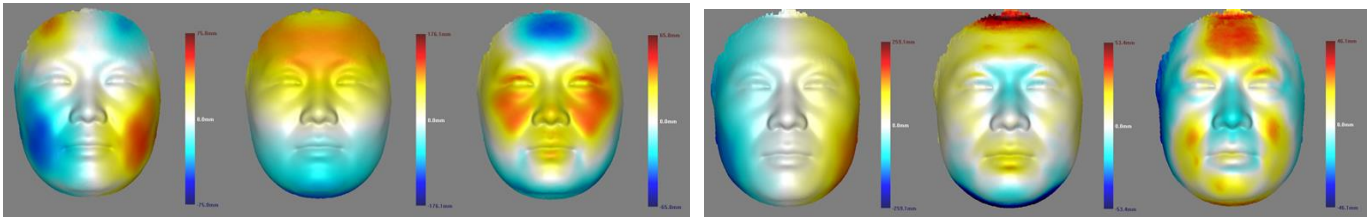

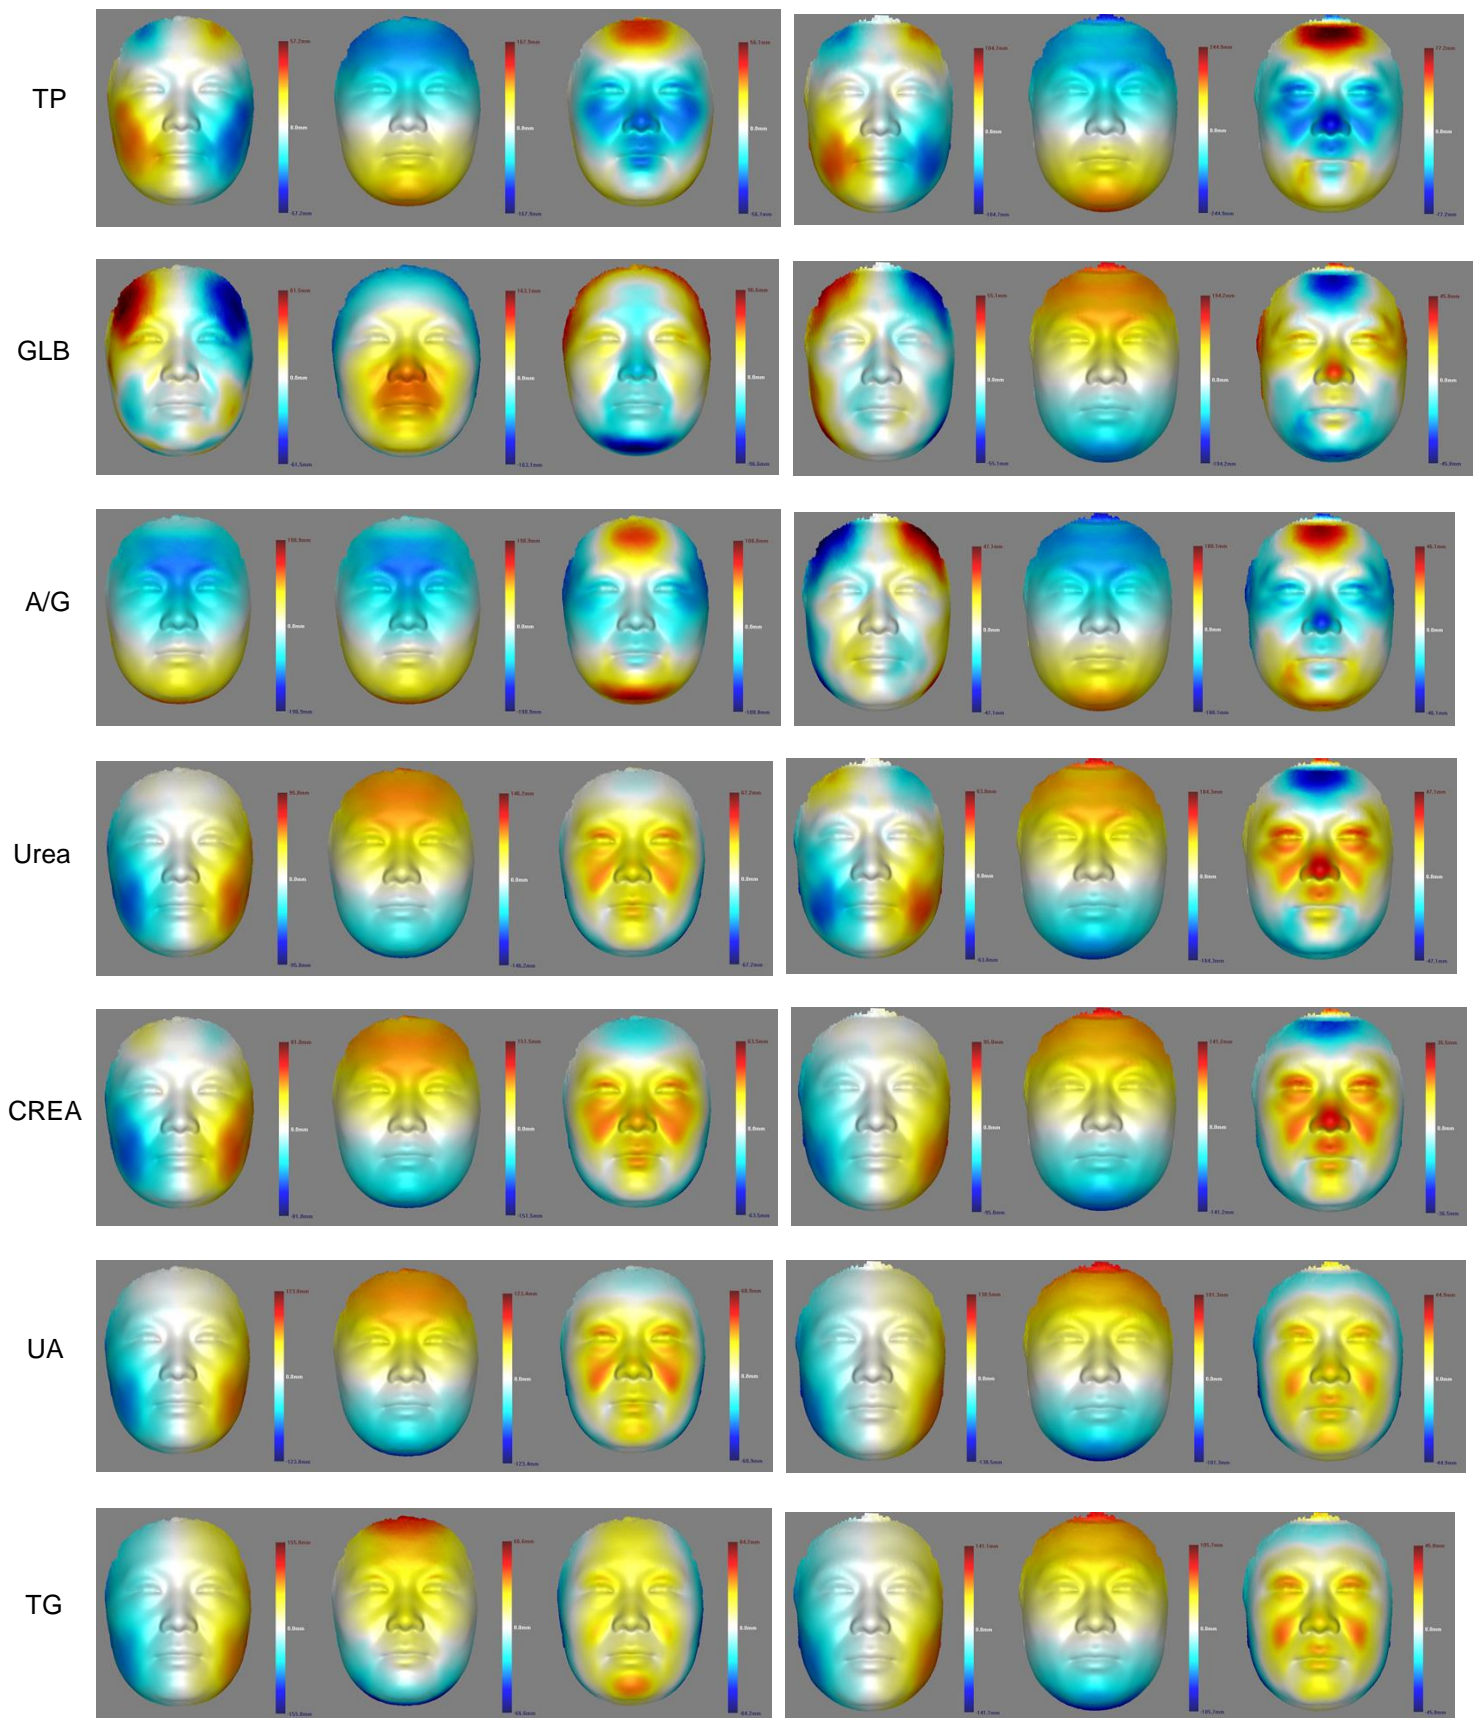

**Fig. S9.** The heat map of 3D-effects showing loading values of PLS component 1 correlated with other indicators from 18 blood serum indicators and 24 blood-cell related indicators (except CHO, LDL-C, HDL-C and ALB in Fig. 4) on female and male faces. Loading values were multiplied by 10,000. Red and blue denote, respectively, higher and lower values along x-, y- and z-axes.
