# Supplementary material
Source: PubMed Central journal article supplement (PMC4423077)
Supplement: cr201536x11.pdf [file cr201536x11.pdf]

**Table S2.** Pearson Correlation Coefficients (PCCs) of each feature or component with chronological age.

| Feature | PCC       |           |                                     |           |           |
|---------|-----------|-----------|-------------------------------------|-----------|-----------|
|         | Female    | Male      | Feature                             | Female    | Male      |
| WBC     | 0.010179  | 0.019708  | ALB                                 | -0.331489 | -0.433673 |
| RBC     | 0.075925  | -0.309568 | GLB                                 | 0.152095  | 0.028234  |
| HGB     | 0.082082  | -0.119563 | A/G                                 | -0.231916 | -0.183015 |
| HCT     | 0.150997  | -0.066844 | Urea                                | 0.370012  | 0.39977   |
| MCV     | 0.097711  | 0.383227  | CREA                                | 0.19194   | 0.04812   |
| MCH     | 0.02536   | 0.321451  | UA                                  | 0.200569  | -0.004722 |
| MCHC    | -0.125483 | -0.137277 | CHO                                 | 0.476137  | 0.258613  |
| PLT     | 0.010512  | -0.278473 | TG                                  | 0.33654   | 0.265193  |
| LYM%    | 0.076903  | -0.171291 | HDL-C                               | -0.198796 | 0.092748  |
| MONO%   | -0.177249 | -0.147641 | LDL-C                               | 0.445936  | 0.121729  |
| NEUT%   | -0.063421 | 0.155835  | Distance between the nose and mouth | 0.296693  | 0.386619  |
| EO%     | 0.102189  | 0.160699  | Mouth width                         | 0.427517  | 0.394237  |
| BA%     | 0.099342  | 0.044885  | Upper lip thickness                 | 0.15452   | -0.021464 |
| LYM#    | 0.105403  | -0.107348 | Lower lip thickness                 | 0.194346  | 0.019285  |
| MONO#   | -0.153076 | -0.055419 | Nose width                          | 0.339082  | 0.416966  |
| NEUT#   | -0.036211 | 0.049814  | Interocular distance                | -0.193436 | -0.324624 |
| EO#     | 0.105483  | 0.181395  | External canthi width               | 0.002295  | -0.034747 |
| BA#     | 0.091013  | 0.097181  | Left eye corner slope               | -0.583151 | -0.476579 |
| RDW-CV  | 0.049158  | 0.196841  | Right eye corner slope              | -0.591725 | -0.557512 |
| RDW-SD  | 0.161641  | 0.262381  | Asymmetry of two eye corner slopes  | 0.204098  | 0.266868  |
| PDW     | -0.002327 | -0.023102 | Body height                         | -0.323761 | -0.159686 |
| MPV     | -0.033559 | -0.073859 | Body weight                         | 0.208118  | 0.14679   |
| P-LCR   | -0.020303 | -0.050374 | Systolic blood pressure             | 0.401169  | 0.288618  |
| PCT     | -0.00144  | -0.332739 | Diastolic blood pressure            | 0.030798  | 0.184701  |
| ALT     | 0.169996  | 0.017188  | Pulse                               | -0.326858 | -0.187329 |
| AST     | 0.229764  | 0.157936  | BMI                                 | 0.372129  | 0.247681  |
| TBIL    | 0.063022  | 0.063995  | Systolic diastolic difference       | 0.493585  | 0.203398  |
| DBIL    | -0.094939 | 0.009614  | Comp.1                              | 0.542262  | 0.49418   |
| IBIL    | 0.09284   | 0.072818  | Comp.2                              | 0.523538  | 0.412684  |
| GGT     | 0.349858  | 0.108781  | Comp.3                              | 0.281446  | 0.414567  |
| ALP     | 0.396427  | 0.056981  |                                     |           |           |
| TP      | -0.099675 | -0.262464 |                                     |           |           |
