# Supplementary material
Source: PubMed Central journal article supplement (PMC4423077)
Supplement: cr201536x12.pdf [file cr201536x12.pdf]

**Table S3.** The distribution of cumulative explained variance.

| Female            |                        | Male              |                        |
|-------------------|------------------------|-------------------|------------------------|
| Components number | Variance explained (%) | Components number | Variance explained (%) |
| 1 comps           | 33.76                  | 1 comps           | 28.23                  |
| 2 comps           | 42.87                  | 2 comps           | 50.06                  |
| 3 comps           | 57.97                  | 3 comps           | 62.14                  |
| 8 comps           | 81.28                  | 8 comps           | 80.52                  |
| 18 comps          | 89.97                  | 19 comps          | 89.82                  |
| 19 comps          | 90.39                  | 20 comps          | 90.56                  |
| 33 comps          | 94.92                  | 33 comps          | 94.96                  |
| 34 comps          | 95.22                  | 34 comps          | 95.14                  |
| 39 comps          | 95.88                  | 39 comps          | 95.85                  |
| 40 comps          | 95.98                  | 40 comps          | 95.95                  |
