# Supplementary material
Source: PubMed Central journal article supplement (PMC4423077)
Supplement: cr201536x13.pdf [file cr201536x13.pdf]

**Table S4.** Correlations between ages predicted by the PLS model with or without adjusting for the age associated features, BMI, or LDLC, cholesterol and albumin.

| With adjusting for BMI |       | With adjusting for CHO, LDLC and ALB |          |
|------------------------|-------|--------------------------------------|----------|
| Female                 | Male  | Female                               | Male     |
| 0.999                  | 0.999 | 0.99997                              | 0.999995 |
