# Supplementary material
Source: PubMed Central journal article supplement (PMC4423077)
Supplement: cr201536x14.pdf [file cr201536x14.pdf]

**Table S5.** Correlations between age predicted by the PLS model with or without removing image features/vertices that are highly correlated ( $PCC \geq 0.3$ ) to the age associated features, BMI, or LDLC, cholesterol and albumin.

| With removing vertices that are highly correlated to BMI |       | With removing vertices that are highly correlated to CHO, LDLC and ALB |       |
|----------------------------------------------------------|-------|------------------------------------------------------------------------|-------|
| Female                                                   | Male  | Female                                                                 | Male  |
| 0.987                                                    | 0.992 | 0.995                                                                  | 0.992 |
